# Supplementary material for: Dark-matter matters: Discriminating subtle blood cancers using the darkest DNA
Source: PLoS Comput Biol. 2019 Aug 30;15(8):e1007332. doi: 10.1371/journal.pcbi.1007332 (PMC6742441; doi:10.1371/journal.pcbi.1007332)
Supplement: S5 Table — (XLSX) [file pcbi.1007332.s006.xlsx]

## Sheet: Sheet1
Disease	Method	F1
AML	SnpEff Functional Impact	0.423838
B-ALL	SnpEff Functional Impact	0.32586
CLL	SnpEff Functional Impact	0.0442322
CML	Mutational Load	0.0574359
CMML	SnpEff Functional Impact	0.242254
MDS	SnpEff Functional Impact	0.177762
PMF	Mutational Load	0.269112
